# Supplementary material
Source: Springer Nature journal article supplement (https://www.springermedizin.de/resource/supplementary/12885_2008_1277_MOESM14_ESM.pdf/9471622)

(a)

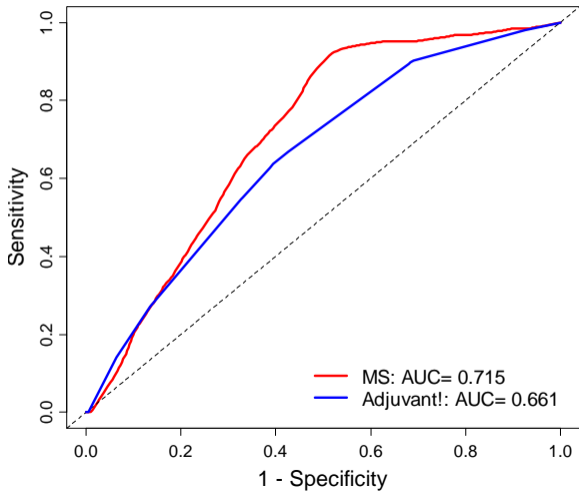

(b)

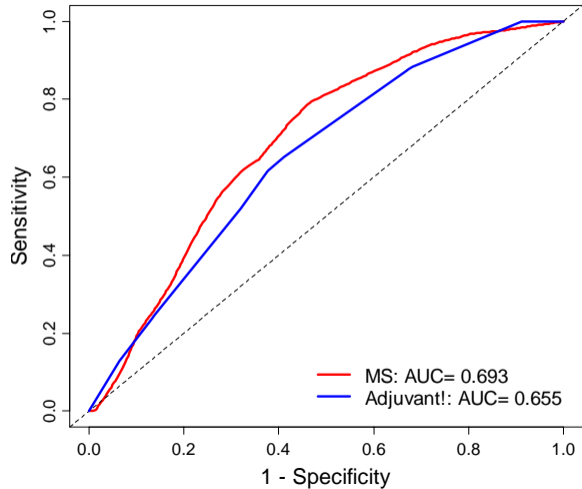

Supplement: MOESM14 [file 9471622]
